1 Using fecal immunochemical tubes for the analysis of the gut microbiome has the  
2 potential to improve colorectal cancer screening

3 Kertu Liis Krigul<sup>1,2</sup>, Oliver Aasmets<sup>1,2</sup>, Kreete Lüll<sup>1,2</sup>, Tõnis Org<sup>1,2</sup>, Elin Org<sup>1\*</sup>

4 <sup>1</sup>Institute of Genomics, Estonian Genome Centre, University of Tartu, Tartu, Estonia;

5 <sup>2</sup>Department of Biotechnology, Institute of Molecular and Cell Biology, University of Tartu, Tartu,  
6 Estonia

7 **Running Title: Using FIT for microbiome analysis in CRC screening**

8 **Keywords:** Colorectal cancer, Gut microbiome, Sample preservation, Fecal immunological test

9 **Additional information:**

10 **Funding.** This work was funded by Estonian Research Council grants PUT 1371 (to EO),  
11 and EMBO Installation grant 3573 (to EO). EO was supported by European Regional  
12 Development Fund Project No. 15-0012 GENTRANSMED and Estonian Center of  
13 Genomics/Roadmap II project No 16-0125. KLK was supported by The European Regional  
14 Development Fund (Smart specialization PhD scholarship). TO was supported by the European  
15 Union through Horizon 2020 research and innovation programme under grant no 81064  
16 and through the European Regional Development Fund project no. MOBEC008.

17

18 **\*Corresponding author:**

19 Elin Org, PhD

20 Institute of Genomics, Estonian Genome Centre

21 University of Tartu

22 Tartu 51010, Estonia

23 phone: (372) 737 4034; fax: (372) 737 4060; email: [elin.org@ut.ee](mailto:elin.org@ut.ee)

24 **Conflict of interest:** The authors declare no potential conflicts of interest.

25 **Word count: 4700 (4489 without figure legends)**

26 **Number of figures and tables:** 5 figures

27 **ABSTRACT**

28 **Background:** Colorectal cancer (CRC) is an important and challenging public health  
29 problem which successful treatment depends on the early detection of the disease. Recently,  
30 colorectal cancer specific microbiome signatures have been proposed as an additional marker for  
31 CRC detection. A desirable aim would be the possibility to analyze microbiome from the fecal  
32 samples collected during CRC screening programs into FIT tubes for fecal occult blood testing.

33 **Methods:** We investigated the impact of the Fecal Immunohistochemical Test (FIT) and  
34 stabilization buffer on the microbial community structure in stool samples from 30 volunteers and  
35 compared their communities to fresh-frozen samples highlighting also the previously published  
36 cancer-specific communities. Altogether 214 samples were analyzed including positive and  
37 negative controls using 16S rRNA gene sequencing.

38 **Results:** The variation between individuals is greater than the differences introduced by  
39 collection strategy. The vast majority of the genera are stable for up to 7 days. None of the changes  
40 observed between fresh frozen samples and FIT tubes are related to previously shown colorectal-  
41 cancer specific bacteria.

42 **Conclusions:** Overall, our results show that FIT tubes can be used for profiling the gut  
43 microbiota in colorectal cancer screening programs as the community is similar to fresh frozen  
44 samples and stable at least for 7 days.

45 **Impact:** Sample material from FIT tubes could be used in addition to fecal  
46 immunochemical tests for future investigations into the role of gut microbiota in colorectal cancer  
47 screening programs circumventing the need to collect additional samples and possibly improving  
48 the sensitivity of FIT.

49

50

51           **INTRODUCTION**

52           Colorectal cancer (CRC) affects millions of people worldwide each year and is one of the  
53 leading causes of death among cancers. Due to its high frequency, CRC has become an important  
54 and challenging public health problem where the detection of cancer at its early stages is of high  
55 importance. Therefore, many countries all over Europe and the world have started population-  
56 based screening programs, which aim to detect CRC by analyzing fecal blood using  
57 immunochemical fecal occult blood test (iFOBT/FIT) followed by invasive colonoscopy.

58           Screening programs face multiple challenges. Depending on the country, the screening  
59 programs invite individuals in the age range of 50-74 to participate (1). Recent data shows,  
60 however, that the incidence of colorectal cancer is increasing especially among younger adults (2).  
61 On average, half of the invited patients do not participate in FIT-based screening programs, even  
62 though there is more than a 90% chance of survival when the cancer is detected in early stage (1,3).  
63 Furthermore, commonly used FIT tests have shown low sensitivity for colorectal cancer lesions  
64 (sensitivity for non-advanced adenomas is 7.6 %) (4). Additionally, FIT tests could have false  
65 negative results due to smoking and advanced age, both well-known risk factors for colorectal  
66 cancer (5), resulting in additional colorectal cancer cases left unnoticed. Moreover, the data has  
67 shown that over 20% of colorectal adenomas can be missed in colonoscopy which is considered  
68 the golden standard of colorectal cancer diagnosis (6,7). In addition, around 30% of FIT-positive  
69 individuals undergoing colonoscopy might have negative colonoscopy (i.e. normal colon without  
70 any pathologies) (8). Due to the aforementioned reasons, highly specific, inexpensive, and  
71 sensitive non-invasive screening tests and additional biomarkers to increase sensitivity are urgently  
72 needed. Gut microbiome has been proposed as a potential additional biomarker.

73           Recent studies indicate that the gut microbiome plays an important role in development of  
74 the immune system (9), etiology of metabolic (10) as well as neurological diseases (11), and cancer  
75 (12–14). The cross-sectional multi-population human studies have shown significant associations  
76 between gut microbiota and colorectal cancer where colorectal cancer microbiome (14) as well as  
77 cancer-stage specific microbial signatures (15) have been detected from stool samples of CRC  
78 patients. It has been suggested that complementing fecal occult blood test with gut microbiota

79 could improve detection of colorectal cancer compared to using the fecal occult blood test alone  
80 (3,16). As both tests use fecal samples, it would be favorable to obtain both fecal occult blood test  
81 and microbiome composition results from the same sample.

82 It has been demonstrated recently that fecal immunochemical test (FIT) tubes used for fecal  
83 occult blood sample collection have the potential to be also used as a sample collection method for  
84 microbiome studies (17,18). An extensive amount of FIT tubes is available on the market that have  
85 different composition and have been shown to perform differently detecting fecal occult blood  
86 from colorectal cancer patients (19), indicating the possibility that they might also vary in  
87 performance to detect the microbiome. The Colorectal Cancer Screening in multiple European  
88 countries (e.g. Sweden, Finland, Estonia, Czech Republic, and Slovakia) use QuikRead® iFOB  
89 Sampling Set (Aidian, Espoo, Finland), however, these particular FIT tubes have not yet been  
90 tested as a method for microbiome sample collection and analysis. Using fecal samples not  
91 originally intended for microbial profiling may introduce technical challenges due to incompatible  
92 materials and varying sample handling and storage conditions. Therefore, the aspects of how  
93 sample processing and storage may potentially influence the microbiota need to be investigated.

94 In the current study, we aimed to explore the potential to determine the composition of the  
95 gut microbiome from the FIT tubes of the QuikRead® iFOB Sampling Set. To test this, we  
96 analyzed 30 volunteers' fecal samples stored in FIT tubes and compared them with two more  
97 storage methods - fresh-frozen or storage in stabilizing solution DNA/RNA Shield (Zymo  
98 Research, Irvine, California). We investigated how storage in FIT and stabilizing solution  
99 DNA/RNA shield affect gut microbiome diversity and composition estimates as well as the  
100 community structure stability over time, compared to the gold standard of immediate freezing.

## 101 MATERIALS AND METHODS

102 **Sample population and collection.** 30 volunteers were recruited in the study, who  
103 contributed their fecal samples for microbiome analyses. 16 (53.3%) of the participants were  
104 female and 14 (46.7%) were male. All recruited subjects were Estonians aged between 22 and 68  
105 ( $39 \pm 12.1$ ) with BMI ranging from 18.4 to 41.8 kg/m<sup>2</sup> (mean  $24 \pm 4.7$  kg/m<sup>2</sup>). Written consent  
106 was obtained from the volunteers and the study followed the sampling protocols which were

107 approved by the Ethics Committee of the University of Tartu.

108         Seven samples were collected for each volunteer and in total 214 samples (including  
109 positive and negative controls) were analyzed in this study. All the samples from the volunteers  
110 were collected within the same week (January, 2020). A fresh stool sample was collected  
111 immediately after defecation with a sterile Pasteur pipette and placed inside a polypropylene  
112 conical 15 ml tube without a preservative and then frozen at -20°C (the “gold standard” of  
113 microbiome studies). From the same fecal sample, each individual collected 3 subsamples in a  
114 QuikRead go iFOBT fecal immunochemical test tube (Aidian, Espoo, Finland) using a stick  
115 attached to the lid according to the instructions provided in the kit. Additionally, 3 aliquots were  
116 collected in 1 ml stabilization buffer tubes (DNA/RNA Shield, Zymo Research, Irvine, California)  
117 using sterile swabs. In order to assess how storage time affects the stability of the community  
118 structure, one FIT tube and one stabilization buffer tube were frozen instantly together with the  
119 fresh stool sample. These tubes were frozen within 16 minutes ( $SD \pm 16.9$ ) after the sample was  
120 taken. Additional FIT and stabilization buffer tubes were stored at room temperature either 96 h  
121 (4 days) or 168h (7 days) and then frozen at -20 °C. The rationale for doing this was that in CRC  
122 screening programs, the time after collecting the initial fecal sample until arriving at the study  
123 center for occult blood testing can take up to a week. Therefore, we wanted to see if longer shipping  
124 times could compromise the stability of the microbial community and affect the results of  
125 microbiome analysis. Furthermore, in addition to the ZymoBIOMICS™ Microbial Community  
126 Standard or MOCK (Zymo Research, Irvine, California) used as a positive control for sequencing,  
127 negative controls for each sample type were used for DNA extraction and sequencing steps.  
128 Workflow for the sample collection and storage conditions is shown in Figure 1.

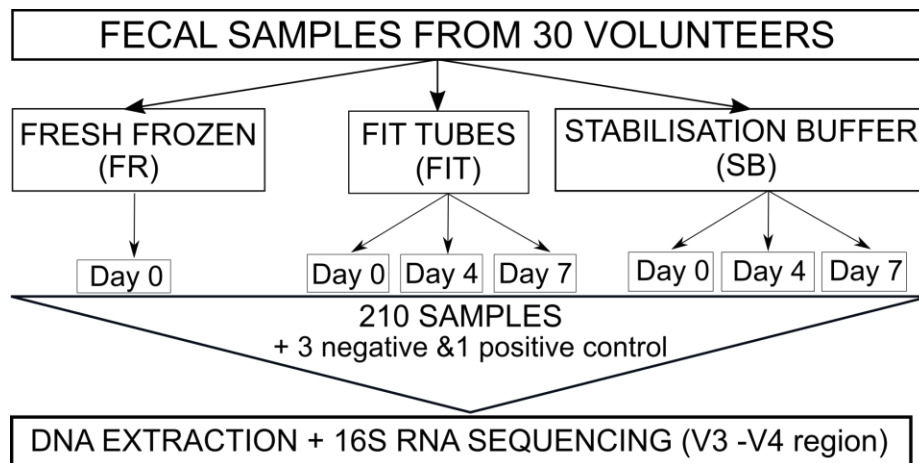

129

130 **Figure 1. Workflow for sample collection and analysis.**

131 **DNA extraction and sequencing.** DNA extraction for all samples was done using Qiagen  
132 DNeasy PowerSoil Pro DNA extraction kit (Qiagen, Venlo, The Netherlands). For fresh-frozen  
133 samples, around 200 mg of stool was used as a starting material following the DNA extraction kit  
134 manufacturer's instructions with the exception that the samples were incubated additional 10  
135 minutes at 65 °C after adding solution CD1 to ensure proper lysis of difficult to lyse bacterial cells.  
136 The cell disruption step was done using Precellys 24 tissue homogenizer (parameters: 2x30 sec,  
137 2500 rpm, 30 second break) (Bertin Instruments, Montigny-le-Bretonneux, France). For the  
138 samples stored in the stabilization buffer, 250 µL of liquid was used as a starting material. The rest  
139 of the protocol was the same as with fresh-frozen samples. For the samples in the FIT tubes, up to  
140 2 ml of the FIT solution was transferred into a new tube and 200 µL of 1M Tris-HCl, pH 7.5 was  
141 added to quench formaldehyde present in the FIT solution. After centrifugation, the supernatant  
142 was discarded, the pellet was taken up in CD1 solution and added to the PowerSoil Pro tubes. To  
143 increase DNA yield, decrosslinking was performed by 4-hour incubation at 65°C with Proteinase  
144 K before the cell disruption step. The rest of the protocol was done following the manufacturer's  
145 instructions. DNA was quantified from all samples using Qubit Fluorometer using dsDNA HS  
146 Assay Kit (Thermo Fisher Scientific) and diluted to 5 ng/µL for sequencing. DNA extraction  
147 protocol was also followed through using negative controls (no solution, as well as FIT and  
148 stabilization buffer tubes with their original solution).

149           **Microbial community analysis.** The amplicon sequencing was conducted as follows in  
150 the Institute of Genomics Core Facility, University of Tartu. Extracted DNA samples were  
151 quantified with Qubit® 2.0 Fluorometer (Invitrogen, Grand Island, USA). The genomic DNA was  
152 amplified using primers 16S\_F (5'- TCGTCGGCAGCGTCAGATGTGTATAAAGAGAC  
153 AGCCTACGGGNGGCWGCAG -3') and 16S\_R (5'-GTCTCGTGGGCTCGGAGATG  
154 TGTATAAAGAGACAGGACTACHVGGGTATCTAATCC -3') for PCR amplification of an  
155 approximately 460 bp region within the hypervariable (V3-V4) region of prokaryotic 16S  
156 ribosomal RNA gene (20). Amplicon libraries for Illumina (Illumina, San Diego, USA) next-  
157 generation sequencing were generated by two-step PCR. First, region specific for 16S rRNA was  
158 amplified with 24 cycles and then Illumina adapter and index sequences were added by 7 cycles  
159 of PCR. The quality control of amplicon libraries was performed by Agilent 2200 TapeStation  
160 analysis (Agilent Technologies, Santa Clara, USA) and with Kapa Library Quantification Kit  
161 (Kapa Biosystems, Woburn, USA). Amplicon libraries were pooled in equimolar concentrations.  
162 Sequencing was carried out on an Illumina MiSeq System using MiSeq Reagent Kit v3 in paired  
163 end 2 × 300 bp mode.

164           Raw sequences were demultiplexed with Illumina bcl2fastq2 Conversion Software v2.20.  
165 Bioinformatics analyses were performed using open-source software QIIME2 (version 2019.7)  
166 (21). Raw data was imported using the q2-tools import script with  
167 PairedEndFastqManifestPhred33 input format. In total, 7,468,645 reads were generated (on  
168 average 34 738 reads per sample). The total number of reads for fresh samples (FR) was 1,116,409  
169 (on average of 37 214 reads), for FIT Day 0 (FIT0) samples 1,048,723 reads (on average of 34 957  
170 reads), for FIT Day 4 (FIT4) 1,066,370 reads (on average of 35 546 reads), and for FIT Day 7  
171 (FIT7) 1,066,370 reads (on average of 34 222 reads). For the stabilization buffer DNA/RNA Shield  
172 the number of reads for Day 0 (SB0) was 1,028,579 reads (on average of 34 286 reads), for  
173 stabilization buffer Day 4 (SB4) 1,127,694 reads (on average 37 590 reads), and for stabilization  
174 buffer Day 7 (SB7) 1,026,705 reads (on average of 34 224 reads).

175           Denoising was done using DADA2 software, which uses a quality-aware model of Illumina  
176 amplicon errors to attain an abundance distribution of sequence variance, which has a difference  
177 of a single nucleotide (22). Based on the quality scores, q2-dada2-denoise script was used to

178 truncate the forward reads at position 250 and trimmed at position 15, and reverse reads were  
179 truncated at position 247 and trimmed at position 12. The chimeras were removed using the  
180 “consensus” filter which detects the chimeras in each sample individually. With this method, the  
181 sequences which are established as chimeric in a fraction of samples are removed. During the  
182 denoising steps, forward and reverse reads are also merged. Subsequently, aligning of Amplicon  
183 Sequence Variants (ASVs) was done using MAFFT (23). Thereafter, FASTTREE was used to  
184 construct phylogeny (24). The taxonomy was assigned using the q2-feature-classifier with the pre-  
185 trained naïve Bayes classifier, which was based on the reference reads from SILVA 16S V3-V4  
186 v132\_99 databases with similarity threshold of 99% (25,26). All samples passed the quality control  
187 (QC) and negative controls, as expected, resulted in 0 ASVs after quality control steps.

188 **Statistical analysis.** Statistical analyses were carried out in RStudio (version 1.2.1335, R version  
189 3.6.1) using packages *phyloseq* (v.1.30.0) (27), *microbiome* (v.1.8.0) (28), *vegan* (v.2.5-6) (29),  
190 *stats* (v.3.2.1) and *ALDEx2* (v.1.18.0) (30). All the visualizations were made using the *ggplot2*  
191 (v.3.2.1) (31). Alpha diversity metrics such as the number of genera (estimates the richness of the  
192 sample) and Shannon diversity Index (takes into account both samples’ richness and evenness)  
193 were calculated on the genus-level microbiome profile using the *phyloseq* package. Between-  
194 sample distances were calculated using Euclidean distance metric on centered log ratio (CLR)  
195 transformed genus-level microbiome profile (32). Permutational Analysis of Variance  
196 (PERMANOVA) on between-sample distances was carried out to test whether differences in  
197 microbial composition (beta-diversity) are associated with sample type and time sample spent on  
198 room temperature. PERMANOVA was done using *adonis* function from *vegan* package (v.2.5-  
199 6.). *Microbiome* package (v.1.6.0) was used to determine the core genera of the microbiome with  
200 a detection threshold of 0 and prevalence threshold of 95%. Welch’s paired t test integrated in the  
201 ANOVA-Like Differential Expression tool (*ALDEx2*, v.1.18.0) was used for differential  
202 abundance analysis of genera to assess whether FIT or stabilization buffer samples differ from  
203 fresh-frozen samples (accuracy of different collection strategies) as well as if there are differences  
204 between samples frozen immediately compared to samples frozen on day 4 or day 7 (stability over  
205 time). In order to limit the number of tests, the genera whose prevalence was less than 10% were  
206 filtered out, leaving 171 out of 360 genera for the analysis. Multiple testing was taken into account



207 using the Benjamini-Hochberg False Discovery Rate (FDR) method and p-values < 0.05 were  
208 considered to be statistically significant (33).

## 209 **RESULTS**

### 210 **Study design.**

211 For each individual in the study, seven stool samples were collected and stored using 3 different  
212 methods prior DNA extraction: 1) fresh, immediately frozen stool samples (FR samples); 2) stool  
213 stored in FIT tubes: immediately frozen (FIT0), stored 4 days (FIT4) or 7 days (FIT7) at room  
214 temperature; 3) stool stored in DNA/RNA shield stabilization buffer: immediately frozen (SB0),  
215 stored 4 days (SB4) or 7 days (SB7) at room temperature) (Figure 1). As expected, the highest  
216 DNA concentration was obtained with the fresh-frozen samples (mean 374,23 ng/ul), followed by  
217 stabilization buffer samples (mean 42,64 ng/ul) and FIT samples (mean 11,68 ng/ul)  
218 (Supplementary Table 1). For each sample, we generated amplicon libraries targeting the bacterial  
219 16S rRNA V3-V4 region, sequenced, performed quality filtering and ASV estimation in QIIME  
220 (see Methods). Following the QC step, the average number of reads per sample remained relatively  
221 stable across all the sample types (Supplementary Table 1). Negative controls had no read counts  
222 after QC step. MOCK community, which was used as a positive control for sequencing, had 18  
223 890 reads after QC step. All genera expected to be present in positive controls (*Staphylococcus*,  
224 *Pseudomonas*, *Enterococcus*, *Escherichia*, *Salmonella*, *Lactobacillus*, *Listeria*, and *Bacillus*),  
225 were detected in the analysis (Supplementary Table 2). In total, we detected 11 948 ASVs, 360  
226 genera, 131 families, 64 orders, 32 classes, and 18 phyla. At day 0, all the sample types captured  
227 similar taxonomic profiles in both phylum and genus taxonomic level (Figure 2, Supplementary  
228 Table 3). As expected, a Western microbial community structure was observed in all of the sample  
229 types with 90% of bacteria belonging to the phyla *Firmicutes* and *Bacteroides*, which are followed  
230 by phyla *Proteobacteria*, *Actinobacteria*, and *Verrucomicrobia* (Figure 2A).

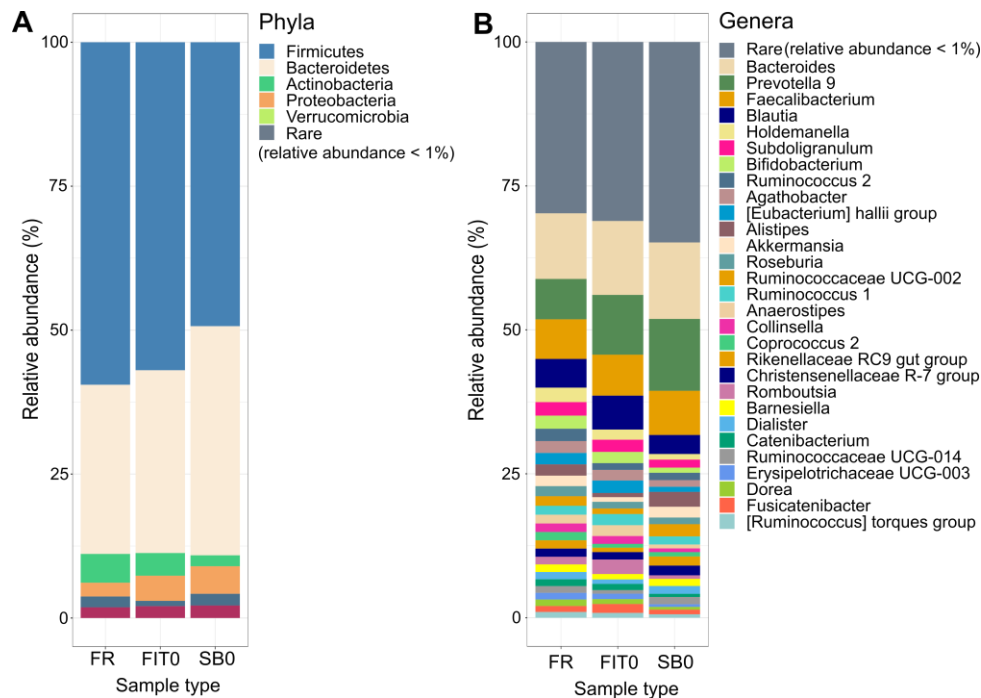

231

232 **Figure 2. Relative abundance of phyla (A) and genera (B) in different collection methods on**  
 233 **day 0.** Taxa with mean relative abundance less than 1% are grouped into rare category.  
 234 Abbreviations: FR – fresh-frozen; FIT0 – immediately frozen FIT samples; SB0 – immediately  
 235 frozen stabilization buffer samples.

236 **Impact of sample collection strategy on the diversity of gut microbiome.** To evaluate  
 237 if FIT and stabilization buffer samples have similar diversity to fresh-frozen samples, we assessed  
 238 differences in the gut microbiome alpha and beta diversity between the collection methods. Both  
 239 alpha diversity (richness and Shannon index) and beta diversity metrics were calculated using  
 240 genus-level transformed data. We detected  $98 \pm 17,6$  genera in FR samples,  $96 \pm 16,3$  genera in  
 241 FIT0, and  $95 \pm 17,4$  in SB0 samples (Supplementary table 4). When comparing richness among  
 242 the sample types, we found that the differences between the observed genera were not significant  
 243 between fresh and the other two sample types ( $FDR_{FR-FIT0} = 0.12$ ,  $FDR_{FR-SB0} = 0.086$ ) (Figure 3A,  
 244 Supplementary table 4). However, the samples stored in FIT and stabilization buffer exhibited  
 245 lower Shannon index values relative to fresh frozen samples ( $FR_{Shannon} = 3.5 \pm 0.3$ ,  $FIT0_{Shannon} =$   
 246  $3.4 \pm 0.3$ ,  $SB0_{Shannon} = 3.3 \pm 0.3$ , paired t test  $FDR < 0.01$ ) (Figure 3B, Supplementary table 4).  
 247 This trend was not only observable between mean Shannon index values in each storage condition,  
 248 but was also noticeable when each individual's samples were visualized. When evaluating beta

249 diversity which represents how much the community changes between sample types, we saw that  
250 the samples of the same individual group together regardless of storage conditions, indicating that  
251 differences between subjects are greater than differences between storage methods (Figure 3C).  
252 Analyzing the significance of variance (PERMANOVA) in samples frozen immediately after  
253 collection, we found sample type to be significant, however the effect on variance was low ( $R^2 =$   
254  $0.2226$ ,  $p < 0.001$ ).

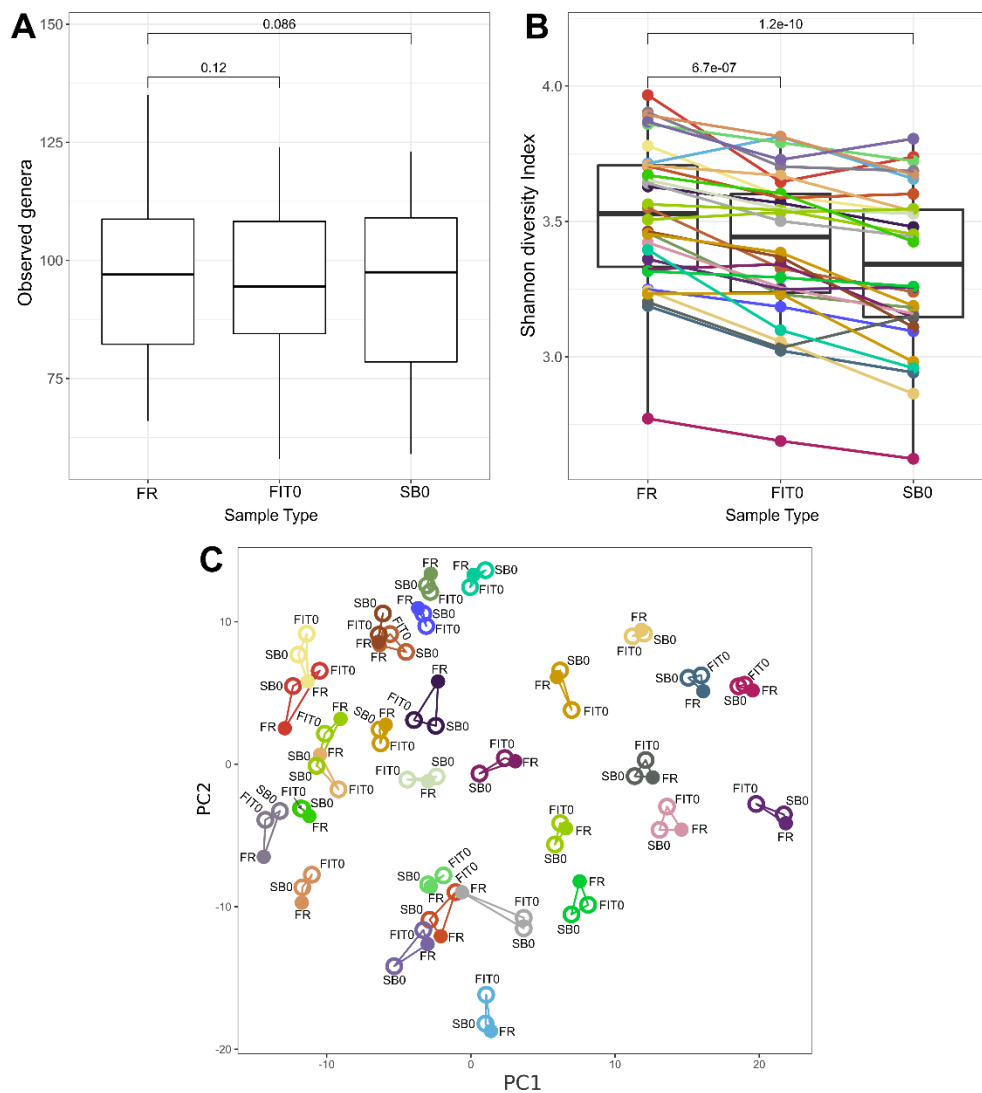

255

256 **Figure 3. Comparison of microbiome diversity between different sample types.** Boxplots  
257 represent two different alpha diversity measurements: (A) richness or the number of taxa observed  
258 and (B) Shannon diversity index. Median values and interquartile ranges have been indicated in

259 the plots. In richness analysis, paired t tests indicated that the differences are not significant  
260 ( $FDR_{FR-FIT0} = 0.12$ ,  $FDR_{FR-SB0} = 0.086$ ). In Shannon diversity index, samples from the same patient  
261 are connected and colored to illustrate the lower trend of alpha diversity for FIT0 and SB0  
262 compared to FR ( $FDR < 0.01$ ). (C) Principal component analysis (PCA) of beta diversity is shown  
263 between storage conditions. Samples are colored and linked based on the individual's ID.  
264 Abbreviations: FR – fresh-frozen; FIT0 – immediately frozen FIT samples; SB0 – immediately  
265 frozen stabilization buffer samples.

266 **Differentially abundant genera between sample collection strategies.** In order to test  
267 the differences between genera abundance, we used ALDEx2 to identify differentially abundant  
268 genera between fresh frozen samples and FIT and stabilization buffer samples. The genera whose  
269 prevalence in all of the samples was less than 10% were filtered out, leaving 171 out of 360 genera  
270 for the analysis. Out of 171 genera analyzed, we observed 7 genera (4%) with statistically different  
271 abundance between FR and FIT0 samples and 16 genera (9,4%) with different abundance between  
272 FR and SB0 samples (Figure 4, Supplementary table 5). The rest of the genera abundances were  
273 not significant after correction for multiple testing ( $FDR > 0.05$ ). Six genera with significantly  
274 different abundance between FIT0 and FR samples (*Alistipes*, *Anaerostipes*, *Eubacterium*  
275 *coprostanoligenes* group, *Romboutsia*, and uncultured *Ruminococcaceae*) had also significantly  
276 different abundance in SB0 samples when compared to FR samples, but only in the *Eubacterium*  
277 *coprostanoligenes* group the change was in the same direction for both FIT0 and SB0.

278

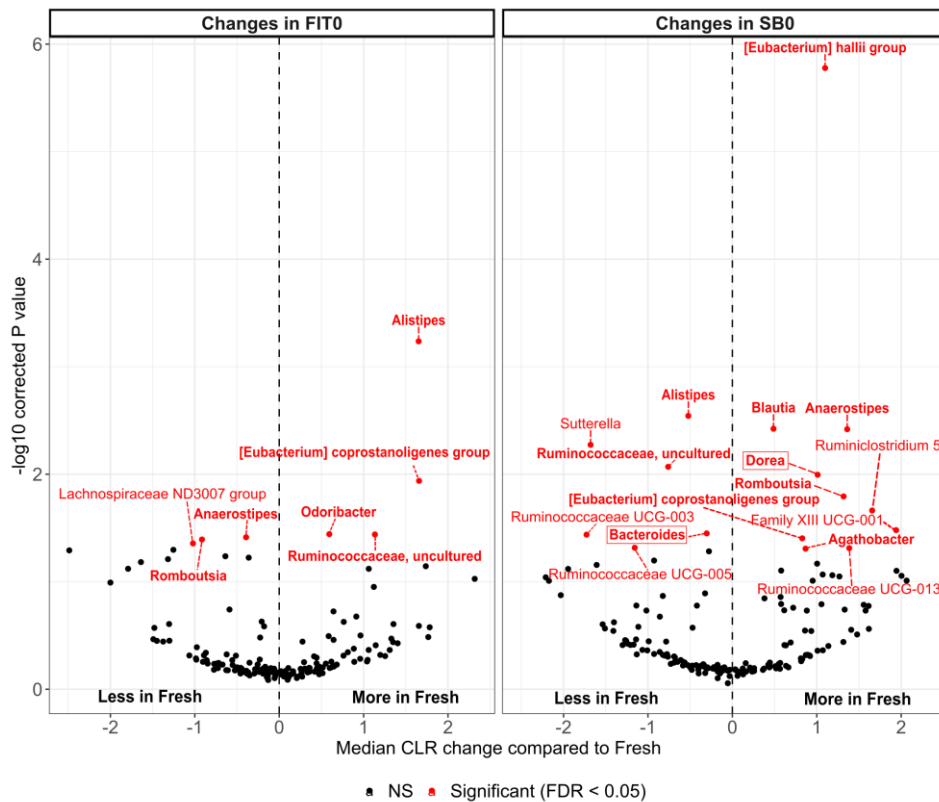

279

280 **Figure 4. Differentially abundant genera between different sample types.** Average CLR  
281 changes in FIT0 and SB0 compared to FRESH samples are shown where significantly different  
282 taxa (Benjamini-Hochberg correction, FDR < 0.05) are colored in red. The genera belonging to  
283 the core 95% are indicated in bold and the genera which have previously been associated with  
284 colorectal cancer are surrounded with a box. Abbreviations: FR – fresh-frozen samples; FIT0 –  
285 immediately frozen FIT samples; SB0 – immediately frozen stabilization buffer samples.

286 Next, we identified 21 genera that belong to core microbiome (the number of genera  
287 present in over 95% of the samples) (Supplementary table 5). Thereafter, we investigated which  
288 out of all significantly different genera belong to the core microbiome and are therefore common  
289 in our sample set. In FIT samples, 6 out of 7 significantly different genera belonged to the core. In  
290 stabilization buffer samples, 10 out of 16 genera belonged to the core. The significantly different  
291 genera belonging to the core are marked bold on Figure 4.

292           Although 16S sequencing does not provide species level annotation, we compared the  
293 genera of the species previously known to be associated with colorectal cancer stages in the multi-  
294 population studies from Wirbel et al. 2019 and Yachida et al. 2019, and analyzed if any of the  
295 genera differed significantly in our sample types (Supplementary table 6)(14,15). Out of all the  
296 taxa significantly differing in FIT0 samples compared to fresh frozen samples, none was shown to  
297 be cancer-related (Figure 4). In SB0 samples cancer-related genera such as *Bacteroides* and *Dorea*  
298 were significantly different compared to fresh frozen samples (Figure 4). We did not detect  
299 *Fusobacteria* which is often associated with colorectal cancer among the genera that are present  
300 in 10% of the samples, indicating that the genera is not common among healthy Estonian  
301 individuals.

302 **Gut microbiome composition stability over time.** Next, we analyzed if the microbiome  
303 composition remains stable in the FIT tubes and stabilization buffer after keeping the samples at  
304 room temperature for 4 or 7 days (Figure 1). To evaluate this, FIT0 samples were compared to  
305 FIT4 and FIT7 samples and the same was done for SB0, SB4 and SB7 samples. Alpha diversity,  
306 beta diversity and differential abundance of the genera were analyzed. We detected no significant  
307 differences between FIT samples frozen on different days in terms of the number of observed  
308 genera ( $FDR_{FIT0-FIT4} = 0.2$ ;  $FDR_{FIT0-FIT7} = 0.9$ ) (Figure 5A) and in Shannon diversity ( $FDR_{FIT0-FIT4}$   
309  $= 0.099$ ;  $FDR_{FIT0-FIT7} = 0.12$ ) (Figure 5B) (Supplementary table 4). *Romboutsia* was the only genera  
310 with significantly different abundance in samples frozen in day 4 and day 7 compared to  
311 immediately frozen FIT samples ( $FDR < 0.05$ ) (Supplementary Table 7).

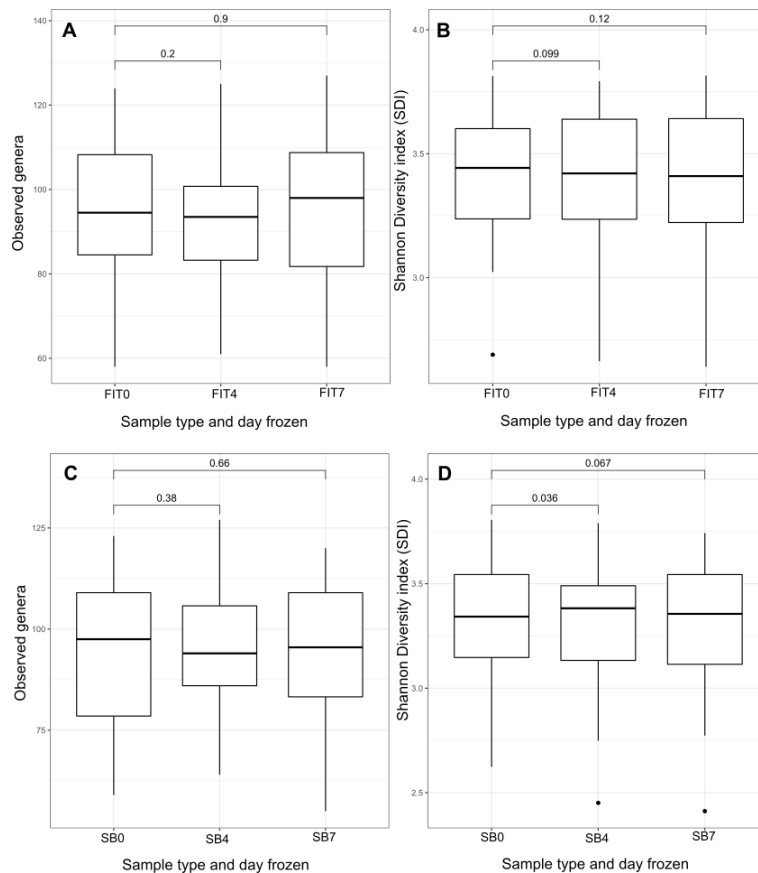

312

313 **Figure 5. Microbiome diversity between different time-points across sample types.** Boxplots  
314 represent observed genera (A) and Shannon diversity index (B) in FIT samples and observed  
315 genera (C) and Shannon diversity index (D) in stabilization buffer samples from different time  
316 points. Abbreviations: FIT0 – immediately frozen FIT samples; FIT4 – FIT samples frozen on day  
317 4; FIT7 – FIT samples frozen on day 7; SB0 – immediately frozen stabilization buffer samples;  
318 SB4 – stabilization buffer samples frozen on day 4; SB7 – stabilization buffer samples frozen on  
319 day 7.

320 Similarly, no significant differences were detected in the number of observed genera between SB0  
321 and SB4 or SB7 samples ( $FDR_{SB0-SB4} = 0.38$ ;  $FDR_{SB0-SB7} = 0.66$ ) (Figure 5C), however Shannon  
322 index was significantly lower in SB0 compared to SB4 ( $FDR_{SB0-SB4} = 0.036$ ;  $FDR_{SB0-SB7} = 0.067$ )  
323 (Figure 5D) (Supplementary table 4). No genera were significantly different between SB0 and SB4  
324 or SB7 samples (Supplementary Table 7).

325 When we used all samples from all the time-points for visualizing beta diversity, we observed that  
326 the samples remained clustered based on the individual, indicating that the inter-individual

327 differences are bigger compared to storage conditions and days when the sample was frozen  
328 (Supplementary Figure 2). This was also supported by PERMANOVA, as the day when the sample  
329 was frozen was not significant ( $R^2 = 0.0012$ ,  $p > 0.05$ ). Furthermore, the results were insignificant  
330 when the interaction between sample type and day frozen was taken into account ( $R^2 = 0.0011$ ,  $p$   
331  $> 0.05$ ).

## 332 **DISCUSSION**

333 Colorectal cancer screening programs all over Europe are using fecal immunochemical test (FIT)  
334 as a first step to detect colorectal cancer. As colorectal cancer associated microbiome signatures  
335 have been obtained from fresh frozen stool samples from patients with different stages of cancer  
336 (14,15), using microbiome for improving colorectal cancer screening has become a topic of high  
337 interest. In the current study, we aimed to test whether the FIT tubes used in national CRC  
338 screening programs are also suitable for microbiome analysis. The particular FIT tube (QuikRead  
339 iFOBT tube) presented in this study has not been previously used to detect microbiome from  
340 human stool. We compared the microbial communities detected from FIT tubes with the fresh  
341 frozen samples. We also used samples collected in stabilization buffer (DNA/RNA Shield) as an  
342 additional collection method for comparison, as stabilization buffers are often used when the  
343 collection of fresh-frozen samples is not feasible. Additionally, we evaluated whether the genera  
344 that are significantly different in either of the collection methods have been previously associated  
345 with colorectal cancer in the multi cohort population studies. Finally, the stability of the  
346 microbiome profile for 4 and 7 days was studied in both FIT and stabilization buffer.

347 Our results indicate that the microbial communities obtained from fresh-frozen samples  
348 and FIT tubes are highly similar. Analysis of microbial alpha-diversity demonstrates that the  
349 number of genera were not statistically different between the storage methods. Small differences  
350 were identified in the Shannon index with microbiome, proving FIT to be less diverse when  
351 compared to fresh-frozen samples. However, beta-diversity analysis clearly showed that the  
352 differences between subjects were greater than differences between different storage methods.  
353 This is in accordance with previous studies that have found interindividual differences to be greater  
354 than intraindividual differences between different collection methods (17,34). This was further



355 confirmed by the results of analysis of variance which also indicated that the storage conditions  
356 have minimal effect (~2%) on the composition of gut microbiome. Donor-specific factors like diet,  
357 age, medications, stool consistency and host genetics are all the likely underlying cause for the  
358 substantial inter-individual beta diversity differences.

359         When analyzing changes in genus abundances, we found that FIT tubes capture a similar  
360 community to fresh frozen samples as only 4% of the genera were significantly different between  
361 the two collection methods. Even though the most of the significantly different genera belonged  
362 to the groups found in the core microbiome (i.e. present in 95% of the samples), none of them have  
363 been previously associated with colorectal cancer in multi-cohort population studies (14,15). This  
364 supports indicating the possibility to use the FIT tubes for studying the microbial biomarkers  
365 related to colorectal cancer.

366         Next, we wanted to see if the stability of the microbial community could be affected by  
367 longer shipping as the time after collecting the initial fecal sample and sending it to the study center  
368 for occult blood testing can take up to a week. When analyzing the effect of the storage time, the  
369 analysis of variance indicated that the effect of the day when the samples were frozen was not  
370 significant. Furthermore, upon comparing the microbial community of FIT samples with different  
371 storage times to immediately frozen FIT tubes, no differences in alpha diversity values were  
372 detected. Again, beta diversity analysis illustrated that the inter-individual differences were greater  
373 than intra-individual differences when data about day 4 and day 7 samples were compared to the  
374 samples which were frozen immediately. Differential abundance analysis revealed only one genus  
375 (*Romboutsia*) to be significantly different in day 4 and day 7 samples compared to immediately  
376 frozen FIT samples, indicating that the abundance of the vast majority of the genera is stable at  
377 least for a week. This is in accordance with previous studies which show that FIT tubes can  
378 preserve gut microbiome from moderate to excellent levels (4,17,34) and the collection method  
379 and time at ambient temperature explain only low amounts of variability (< 10%) (17). These  
380 studies have, however, all used FIT tubes from other manufacturers (OC-Sensor and OC-Auto®  
381 FIT).

382           Our study also included a stabilization buffer sample. Previous studies indicate that using  
383 a stabilizing buffer is necessary when samples cannot be frozen immediately as certain bacterial  
384 taxa start to bloom in untreated samples after spending days in room temperature (17,35). We  
385 found that the microbiome community in the stabilization buffer is slightly less similar to fresh  
386 frozen samples compared to FIT tubes. Although the community was relatively similar to fresh-  
387 frozen tubes in terms of microbial diversity and remained stable up to 7 days, the number of  
388 significant differences were higher in colorectal-cancer related bacteria, core genera as well as in  
389 the number of significantly different genera compared to the differences found between FIT and  
390 fresh frozen samples. Additionally, Shannon diversity was significantly lower compared to fresh  
391 frozen samples as well as when comparing SB0 to SB4 samples.

392           In summary, our results show that FIT tubes are suitable for storing fecal samples for  
393 microbiome studies as the captured microbiome profile is similar to fresh frozen samples and  
394 remains stable up to 7 days. However, the actual ability to detect cancer specific bacterial  
395 signatures with this collection method needs to be confirmed in the future using specific  
396 phenotypes such as FIT positive patients with and without colorectal cancer among other diseases.  
397 Analyzing the CRC-specific microbiome profile from the same FIT tubes used for fecal occult  
398 blood testing would allow to improve the detection of CRC with additional microbiome-based  
399 biomarkers. This could potentially make the CRC diagnostics more sensitive and cost-efficient.  
400 Fecal samples from CRC screening programs can provide a great resource for biomarker discovery  
401 and possibly lead to earlier detection of cancer or prior to its onset (pre-cancer state). In addition,  
402 FIT tubes could also be used in studying the role of microbiome in other diseases like pancreatic  
403 cancer, inflammatory bowel syndrome, and diverticulitis as well as in population studies where  
404 samples are often sent via post and using fresh-frozen samples is not possible. Future studies  
405 should also investigate the possibility to use the stool samples collected in FIT tubes for  
406 metagenomics and metabolomics analysis, which could provide additional information for early  
407 CRC detection.

#### 408           **Acknowledgements**

409 We thank all the participants for participating in this study and University of Tartu core  
410 facility for sequencing the samples. The authors acknowledge the financial support provided by  
411 COST-European Cooperation in Science and Technology to the CA17118 “Identifying Biomarkers  
412 Through Translational Research for Prevention and Stratification of Colorectal Cancer.

## 413 REFERENCES

- 414 1. Senore C, Basu P, Anttila A, Ponti A, Tomatis M, Vale DB, et al. Performance of  
415 colorectal cancer screening in the European Union Member States: Data from the second  
416 European screening report. *Gut*. 2019;
- 417 2. Vuik FER, Nieuwenburg SA V, Bardou M, Lansdorp-Vogelaar I, Dinis-Ribeiro M, Bento  
418 MJ, et al. Increasing incidence of colorectal cancer in young adults in Europe over the last  
419 25 years. *Gut* [Internet]. 2019;68:1820 LP – 1826. Available from:  
420 <http://gut.bmj.com/content/68/10/1820.abstract>
- 421 3. Baxter NT, Ruffin MT, Rogers MAM, Schloss PD. Microbiota-based model improves the  
422 sensitivity of fecal immunochemical test for detecting colonic lesions. *Genome Med*.  
423 2016;
- 424 4. Baxter NT, Koumpouras CC, Rogers MAM, Ruffin MT 4th, Schloss PD. DNA from fecal  
425 immunochemical test can replace stool for detection of colonic lesions using a microbiota-  
426 based model. *Microbiome*. England; 2016;4:59.
- 427 5. Stegeman I, De Wijkerslooth TR, Stoop EM, Van Leerdam M, Van Ballegooijen M,  
428 Kraaijenhagen RA, et al. Risk factors for false positive and for false negative test results  
429 in screening with fecal occult blood testing. *Int J Cancer*. 2013;
- 430 6. Van Rijn JC, Reitsma JB, Stoker J, Bossuyt PM, Van Deventer SJ, Dekker E. Polyp miss  
431 rate determined by tandem colonoscopy: A systematic review. *Am. J. Gastroenterol*. 2006.
- 432 7. Leufkens AM, Van Oijen MGH, Vleggaar FP, Siersema PD. Factors influencing the miss  
433 rate of polyps in a back-to-back colonoscopy study. *Endoscopy*. 2012;
- 434 8. Rivero-Sánchez L, Grau J, Augé JM, Moreno L, Pozo A, Serradesanferm A, et al.

- 435 Colorectal cancer after negative colonoscopy in fecal immunochemical test-positive  
436 participants from a colorectal cancer screening program. *Endosc Int open*. 2018;6:E1140–  
437 8.
- 438 9. Olin A, Henckel E, Chen Y, Lakshmikanth T, Pou C, Mikes J, et al. Stereotypic Immune  
439 System Development in Newborn Children. *Cell*. 2018;
- 440 10. Tilg H, Zmora N, Adolph TE, Elinav E. The intestinal microbiota fuelling metabolic  
441 inflammation. *Nat. Rev. Immunol*. 2020.
- 442 11. Cryan JF, O’Riordan KJ, Sandhu K, Peterson V, Dinan TG. The gut microbiome in  
443 neurological disorders. *Lancet Neurol*. 2020.
- 444 12. Zeller G, Tap J, Voigt AY, Sunagawa S, Kultima JR, Costea PI, et al. Potential of fecal  
445 microbiota for early-stage detection of colorectal cancer. *Mol Syst Biol*. 2014;
- 446 13. Zackular JP, Rogers MAM, Ruffin MT, Schloss PD. The human gut microbiome as a  
447 screening tool for colorectal cancer. *Cancer Prev Res*. 2014;
- 448 14. Wirbel J, Pyl PT, Kartal E, Zych K, Kashani A, Milanese A, et al. Meta-analysis of fecal  
449 metagenomes reveals global microbial signatures that are specific for colorectal cancer.  
450 *Nat Med [Internet]*. 2019;25:679–89. Available from: <https://doi.org/10.1038/s41591-019-0406-6>  
451
- 452 15. Yachida S, Mizutani S, Shiroma H, Shiba S, Nakajima T, Sakamoto T, et al. Metagenomic  
453 and metabolomic analyses reveal distinct stage-specific phenotypes of the gut microbiota  
454 in colorectal cancer. *Nat Med [Internet]*. 2019;25:968–76. Available from:  
455 <https://doi.org/10.1038/s41591-019-0458-7>
- 456 16. Gao R, Wang Z, Li H, Cao Z, Gao Z, Chen H, et al. Gut microbiota dysbiosis signature is  
457 associated with the colorectal carcinogenesis sequence and improves the diagnosis of  
458 colorectal lesions. *J Gastroenterol Hepatol*. 2020;
- 459 17. Byrd DA, Chen J, Vogtmann E, Hullings A, Song SJ, Amir A, et al. Reproducibility,  
460 stability, and accuracy of microbial profiles by fecal sample collection method in three

- 461 distinct populations. PLoS One [Internet]. Public Library of Science; 2019;14:e0224757.  
462 Available from: <https://doi.org/10.1371/journal.pone.0224757>
- 463 18. Rounge TB, Meisal R, Nordby JI, Ambur OH, de Lange T, Hoff G. Evaluating gut  
464 microbiota profiles from archived fecal samples. BMC Gastroenterol. England;  
465 2018;18:171.
- 466 19. Daly JM, Xu Y, Levy BT. Which Fecal Immunochemical Test Should I Choose? J Prim  
467 Care Community Health. United States; 2017;8:264–77.
- 468 20. Klindworth A, Pruesse E, Schweer T, Peplies J, Quast C, Horn M, et al. Evaluation of  
469 general {16S} ribosomal {RNA} gene {PCR} primers for classical and next-generation  
470 sequencing-based diversity studies. Nucleic Acids Res. 2012;
- 471 21. Bolyen E, Rideout JR, Dillon M, Bokulich N, Abnet C, Al-Ghalith G, et al. QIIME 2:  
472 Reproducible, interactive, scalable, and extensible microbiome data science. PeerJ. 2018;
- 473 22. Callahan BJ, McMurdie PJ, Rosen MJ, Han AW, Johnson AJA, Holmes SP. DADA2:  
474 High-resolution sample inference from Illumina amplicon data. Nat Methods. 2016;
- 475 23. Katoh K, Standley DM. MAFFT multiple sequence alignment software version 7:  
476 Improvements in performance and usability. Mol Biol Evol. 2013;
- 477 24. Price MN, Dehal PS, Arkin AP. FastTree 2 - Approximately maximum-likelihood trees  
478 for large alignments. PLoS One. 2010;
- 479 25. Bokulich NA, Kaehler BD, Rideout JR, Dillon M, Bolyen E, Knight R, et al. Optimizing  
480 taxonomic classification of marker-gene amplicon sequences with QIIME 2's q2-feature-  
481 classifier plugin. Microbiome. 2018;
- 482 26. Quast C, Pruesse E, Yilmaz P, Gerken J, Schweer T, Yarza P, et al. The SILVA ribosomal  
483 RNA gene database project: Improved data processing and web-based tools. Nucleic  
484 Acids Res. 2013;
- 485 27. McMurdie PJ, Holmes S. Phyloseq: An R Package for Reproducible Interactive Analysis

- 486 and Graphics of Microbiome Census Data. PLoS One. 2013;
- 487 28. Leo L, Shetty S. microbiome R package. Bioconductor. 2017.
- 488 29. Oksanen J, Blanchet FG, Kindt R, Legendre P, Minchin PR, O'Hara RB, et al. Package  
489 vegan: Community Ecology Package. R Packag. version 2.3-1. 2013.
- 490 30. Fernandes AD, Macklaim JM, Linn TG, Reid G, Gloor GB. ANOVA-Like Differential  
491 Expression (ALDEx) Analysis for Mixed Population RNA-Seq. PLoS One. 2013;
- 492 31. Ginestet C. ggplot2: Elegant Graphics for Data Analysis. J R Stat Soc Ser A (Statistics  
493 Soc. 2011;
- 494 32. Gloor GB, Macklaim JM, Pawlowsky-Glahn V, Egozcue JJ. Microbiome datasets are  
495 compositional: And this is not optional. Front. Microbiol. 2017.
- 496 33. Benjamini Y, Hochberg Y. Controlling the False Discovery Rate: A Practical and  
497 Powerful Approach to Multiple Testing. J R Stat Soc Ser B. 1995;
- 498 34. Gudra D, Shoaie S, Fridmanis D, Klovins J, Wefer H, Silamikelis I, et al. A widely used  
499 sampling device in colorectal cancer screening programmes allows for large-scale  
500 microbiome studies. Gut. 2019.
- 501 35. Amir A, McDonald D, Navas-Molina JA, Debelius J, Morton JT, Hyde E, et al.  
502 Correcting for Microbial Blooms in Fecal Samples during Room-Temperature Shipping.  
503 mSystems. 2017;
- 504

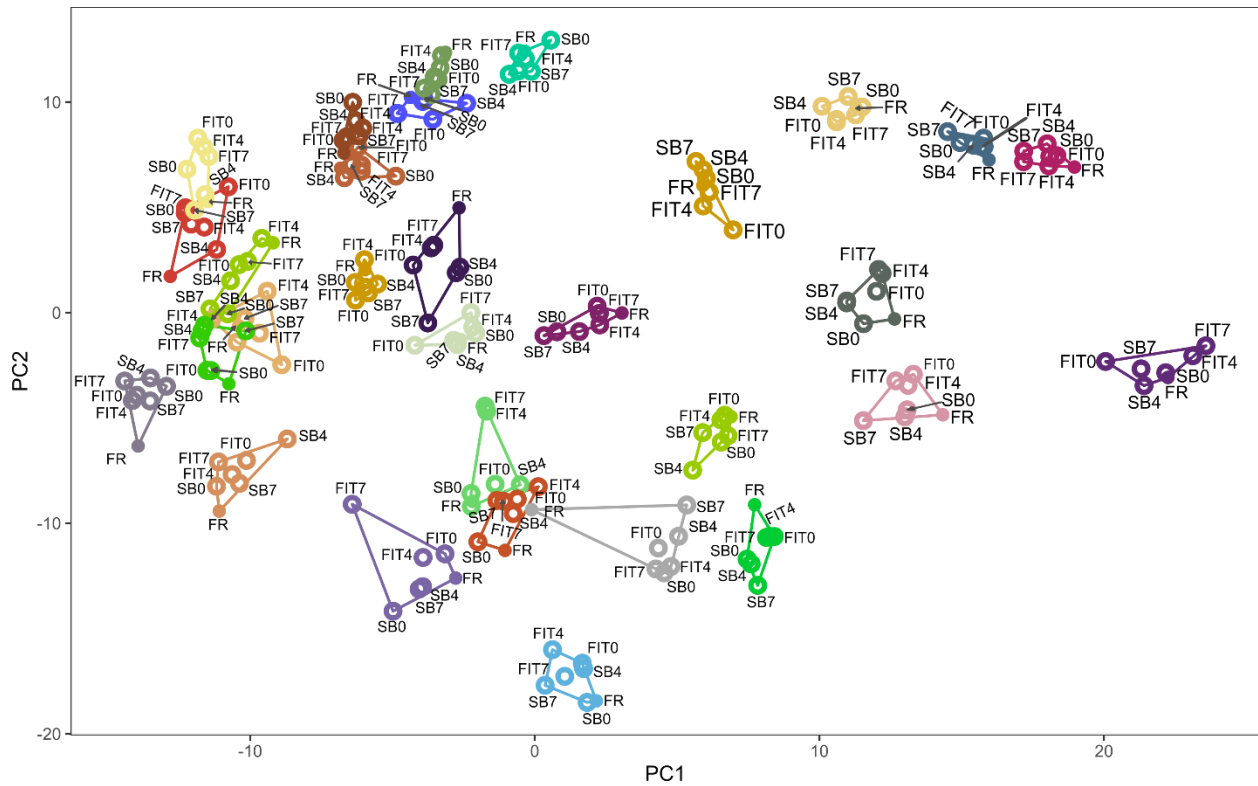

Source: https://biorxiv.org/content/10.1101/2021.03.15.435399v1.full.pdf
